# Supplementary material for: Diagnosis of traumatic brain injury using miRNA signatures in nanomagnetically isolated brain-derived extracellular vesicles
Source: Royal Society of Chemistry journal article supplement (doi:10.1039/c8lc00672e), 2018-01-01
Supplement: c8lc00672e1.xlsx [file c8lc00672e1.xlsx]

## Sheet: Sheet1
	Mice Sham controls
miR-129-5p	32.49	32.55	32.55	31.95	31.13	31.22	30.6	31.26	31.11	31.59	30.31	31.34	31.03	32.11	31.6	31.9	31.23	31.56	31.98	31	30.6	31.46	31.34	31.28	31.2	33.8	32.36	32.53	31.38	32.69
miR-152-5p	32.45	31.18	31.24	31.23	30.68	30.54	30.07	30.96	32.26	31.76	29.41	30.91	30.04	31.89	31.87	32.45	30.14	30.79	31.53	31.06	29.91	30.79	30.49	31.05	30.05	32.55	32.33	31.15	31.82	32.32
miR-21a-5p	15.55	16.22	18.63	17.05	17.14	17.51	17.14	17.13	17.32	16.21	16.45	16.29	16.03	17.06	16.97	17.74	16.06	15.86	16.17	16.27	16.16	15.69	16.49	15.51	15.47	18.53	21.13	17.3	17.43	17.22
miR-212-5p	34.65	33.78	34.69	33.95	32.85	33.26	33.27	34.32	34.5	33.45	33.03	33.9	33.14	34.46	34.59	34.37	33.25	33.55	33.34	33.43	32.66	33.37	32.78	33.65	32.53	35.93	34.29	33.67	33.14	34.63
miR-374b-5p	21.73	23.12	24.53	21.61	22.72	22.28	22.27	22.34	22.35	21.38	23.22	22.1	22.09	24.65	24.05	23.17	22.51	21.24	22.27	22.8	22.01	21.59	23.91	20.39	23.79	25.28	26.38	23.57	23.71	23.99
miR-664-3p	26.42	25.63	28.5	27.03	25.38	25.87	25.37	25.92	26.23	25.45	24.68	25.42	25.34	28.73	28.47	27.74	25.82	25.04	26.07	25.74	24.46	24.21	26.36	25.14	25.37	27.87	26.34	25.88	25.4	27.44
miR-9-5p	26.43	25.87	26.33	26.53	26.98	26.42	26.72	26.6	25.83	26.1	26.42	27.04	26.63	26.39	26.45	26.39	26.72	26.55	26.43	26.52	26.91	26.42	26.61	27.08	26.38	26.77	26.24	26.89	26.93	26.66
RNU6	27.58	27.64	27.69	27.18	25.88	26.77	26.35	26.2	26.6	26.05	25.62	26.7	27.06	26.76	27.19	27.36	27.22	27.01	26.3	26.25	25.66	25.82	26.22	26.28	29.49	30.47	28.73	27.61	27.33	27.49
	Mice low blast, 1 hr
miR-129-5p	33.57	31.17	31.64	32.02	31.64	32.32	31.98	31.95	33.63	30.9	30.56	31.06	29.54	31.19	30.37	30.67
miR-152-5p	33.75	28.16	28.66	28.63	28.79	28.16	29.43	28.87	29.52	29.39	28.15	28.73	29.11	29.06	28.44	28.43
miR-21a-5p	16.6	14.98	15.05	15.32	14.89	15.87	15.19	16.07	16.49	15.55	15.58	15.75	16.39	15.52	15.59	16.67
miR-212-5p	36.14	32.95	33.08	33.23	32.79	32.75	33.25	33.96	34.99	32.27	31.45	32.88	32.71	33.32	33.35	32.77
miR-374b-5p	24.06	22.77	22.36	22.66	20.29	23.32	20.65	23.38	24.63	20.25	21.44	23.39	24.14	23.07	24.36	24.82
miR-664-3p	26.82	24.63	25.46	25.44	24.38	25.01	25.31	26.01	26.6	24.09	24.1	26.91	25	26.1	25.68	25.78
miR-9-5p	34.72	32.34	32.35	31.99	30.37	31.64	31.55	33.29	32.43	30.5	31.05	32.9	33.48	35.17	34.19	33.93
RNU6	28.98	25.1	26.36	26.49	26.92	25.62	27.92	27.69	29.41	24.94	27.06	30.89	28.14	28.24	27.36	28.62
	Mice low blast, 1 day
miR-129-5p	31.13	32.26	31.39	30.71	30.95	29.86	31.35	33.02	30.54	31.61	32.23	29.19	29.45	27.63	29.32
miR-152-5p	30.33	34.01	32.39	31.12	31.84	30.63	31.54	33.79	31.12	31.63	31.16	28.27	28.47	27.3	29.12
miR-21a-5p	15.85	18.09	16.3	15.85	16.79	16.17	16.86	17.65	16.46	16.82	17.88	15.09	14.92	15.25	15.68
miR-212-5p	34.1	35.33	34.74	34.64	33.75	33.03	33.74	36.11	32.98	33.49	33.75	31.38	31.43	29.77	31.97
miR-374b-5p	24.81	26.01	24.32	24	23.59	22.86	22.97	25.54	23.74	24.07	27.23	22.06	21.84	22.6	23.17
miR-664-3p	25.84	27.47	26.62	26.11	25.81	24.61	25.7	28.36	26.17	25.7	27.15	23.71	23.55	22.63	24.68
miR-9-5p	33.61	35.06	34.28	33.93	33.41	32.02	32.5	34.58	32.94	32.42	35.48	32.51	31.71	31.18	33.47
RNU6	28.15	29.03	27.64	27.67	26.9	28.71	29.37	29.17	29.3	27.78	28.63	25.13	26.05	25.42	27.17
	Mice low blast, 4 days
miR-129-5p	33.01	30.57	33.95	33.02	34.13	35.44	30.9	31.06	29.21	31.5	31.36	30.63	29.94	30.45	29.64
miR-152-5p	31.46	29.94	33.44	32.49	34.15	34.25	30.71	29.94	29.33	30.25	29.29	29.35	28.78	30.32	28.73
miR-21a-5p	15.24	14.86	16.31	15.55	16.7	17.24	14.97	15.09	13.65	15.46	16.59	15.73	15.51	16.16	15.16
miR-212-5p	35.28	32.7	38.41	38.66	38.87	38.54	32.36	32.92	32.22	33.47	33.42	31.56	31.82	33.63	32.02
miR-374b-5p	24.31	20.17	26.15	23.22	25.66	26.08	22.23	20.77	19.02	22.25	23.96	23.65	22.96	23.17	21.96
miR-664-3p	26.32	23.98	29.3	27.61	28.07	29.68	24.96	24.67	23.16	25.31	26.13	26.16	25.47	26.24	24.57
miR-9-5p	33.99	28.85	35.9	35.28	35.23	36.41	31.87	30.8	29.76	31.69	34.22	33.96	33.51	34.19	33.08
RNU6	27.82	24.59	31.63	31.1	29.55	30.88	27.29	26.92	23.78	25.77	28.48	27.31	27	28.5	27.26
	Mice low blast, 14 days
miR-129-5p	33.18	32.87	33.07	33.77	33.63	33.59	32.58	33.28	33.02	33.49	30.45	33.42	30.5	32.54	30.76
miR-152-5p	31.68	30.99	31.59	32.55	32.05	32.12	32.15	31.84	32.12	32.92	28.86	32.62	30.41	30.45	29.53
miR-21a-5p	17.16	16.87	17.29	16.68	16.73	17.46	16.67	17.92	17.71	18.98	16.54	19.79	16.99	16.5	16.98
miR-212-5p	34.78	34.77	34.3	35.53	33.79	35.02	34.98	36.02	34.66	36.56	32.99	35	32.32	33.46	32.81
miR-374b-5p	22.9	22.67	23.15	22.1	23.01	22.97	23.89	24.15	23.58	24.83	26.47	28.14	26.69	24.72	25.13
miR-664-3p	25.97	26.01	26.48	27.13	26.51	27	27.57	27.16	26.78	27.97	25.97	28.28	26.52	26.48	26.02
miR-9-5p	33.58	33.31	33.75	33.14	33.02	34.23	33.9	34.32	33.63	35.92	34.72	38.02	35.52	35.31	34.07
RNU6	27.34	26.89	28.13	29.18	26.77	28.64	27.46	28.01	27.45	28.39	29.3	33.17	29.9	30.35	29.11
	Mice high blast, 1 hr
miR-129-5p	35.52	32.61	35.2	31.91	35.04	28.02	35.94	30.47	31.59	32.95	32.02	30.87	29.82	32.24	30.32	29.3
miR-152-5p	32.54	31.72	32.48	30.13	32.54	29.79	32.8	29.15	31.62	32.23	31.49	27.57	27.53	29.51	27.6	26.98
miR-21a-5p	18	18.08	16.87	16.08	17.54	16.23	17.92	15.89	16.99	17.03	15.75	15.87	15.4	17.59	15.62	15.09
miR-212-5p	36.96	35.8	36.91	34.17	36.96	32.04	38.54	33.56	35.57	37.41	36	32.67	31.36	34.63	32.01	31.52
miR-374b-5p	23.58	23.61	23.87	22.05	23.49	22.28	23.47	22.41	23.97	23.54	23.35	24.73	24.81	26	25.03	22.68
miR-664-3p	30.66	26.6	29.47	26.5	29.67	26.2	29.99	25.41	27.48	27.63	28.09	25.11	24.82	33.13	25.61	24.15
miR-9-5p	35.69	34.62	32.92	31.14	34.26	29.98	34.22	30.77	30.79	33.05	32.58	33.8	33.22	39.74	32.77	31.58
RNU6	35.73	27.77	35.34	26.75	34.44	26.6	34.83	26.06	33.4	35.41	31.56	28.93	28.32	35.99	29.09	28.94
	Mice repetitive low blast, 1 hr
miR-129-5p	33.67	33.89	34.36	32.78	31.29	31.97	32.34	31.95	31.61	32.58	31.15	30.24	31.09	31
miR-152-5p	34.45	34.26	35.15	33.51	31.95	32.29	32.62	32.02	32.44	30.41	30.51	29.1	28.34	28.78
miR-21a-5p	18.3	17.13	17.85	17	16.6	16.72	17.16	15.96	15.96	17.13	17.1	15.28	15.84	15.87
miR-212-5p	38.5	37.17	37.68	35.36	34.52	35.49	35.34	35.41	35.13	28.06	34.39	32.61	32.15	32.03
miR-374b-5p	24.3	23.28	23.46	23.73	22.5	23.42	23.53	21.71	22.45	26.01	25.1	23.99	25.18	24.36
miR-664-3p	29.2	28.56	31.37	27.09	26.03	26.92	26.67	26.35	26.12	27.66	26.89	25.97	23.37	26.55
miR-9-5p	36.27	35.22	34.9	35.69	32.69	33.64	33.92	32.74	33.08	37.2	33.34	33.71	34.91	32.57
RNU6	30.66	28.08	30	28.92	26.03	27.39	27.71	27.04	25.53	30.37	29.17	28.98	29.42	28.2
	TBI patients (human)
miR-129-5p	31.42	32.16	27.74	31.48	34.16	34.32	32.01	30.86	31.92	30.72	39.3	29.01	35.85	34.72	32.59	30.7	27.42	38.91	29.89	31.72	35.55	31.72	29.93	30.4	29.73	33.81	30.93	28.62	29.99	32.69	31.11	31.92	31.88	32.06	32.01	31.68	34.32
miR-152-5p	37.21	40	33.39	39.83	40	40	40	35.74	35.78	36.79	37.81	34.55	40	40	37.33	37.55	33.21	40	33.07	37.61	40	37.72	37.22	37.89	36.03	40	35.64	34.89	38.1	40	40	40	37.82	40	40	38.83	40
miR-21a-5p	20.98	21.12	23.92	21.99	24.6	25.33	21.1	22.11	23.79	26.62	22.85	20.74	31.72	27.89	21.78	21.21	23.35	24.3	24.16	27.07	24.85	21.93	21.43	23.07	24.1	34.14	21.53	22.27	19.6	21.49	26.31	20.16	21.22	21.94	20.8	21.47	25.75
miR-212-5p	40	40	40	40	40	40	40	38.23	34.4	37.2	40	35.37	40	40	40	40	32.01	40	32.02	38.49	40	40	37.93	36.14	35.7	40	36.88	35.89	36.4	40	39.3	38.94	40	40	40	38.87	40
miR-374b-5p	38.43	40	31.3	40	40	39.44	40	35.91	31.68	33.65	39.12	33.06	40	39.94	37.07	35.45	31.75	39.9	35.12	35.33	40	36.9	35	34.06	33.13	36.81	34.86	32.9	35.58	40	36.73	40	38.49	39.01	39.56	40	40
miR-664-3p	30.52	31.33	30.1	30.88	36.33	36.2	30.11	31.99	33.39	32.1	36.97	29.09	37.48	36.95	32.86	30.6	28.09	37.26	30.13	33.83	40	30.38	30.43	32.05	31.38	35.58	30.65	31.78	30.64	30.93	33.14	31.14	30.55	32.33	29.25	30.89	36.2
miR-9-5p	36.55	40	24.44	35.12	40	40	34.63	36.61	35.16	39.47	40	35.66	40	40	40	32.33	26.58	39.59	24.92	39.26	40	34.22	33.59	37.54	34.83	40	39.83	37.92	35.24	34.95	37.04	36.87	36.1	39.37	34.68	35.33	40
RNU6	31.98	34.11	37.98	31.33	37.84	36.99	32.11	30.85	33.72	37.44	39.8	29.66	40	36.66	34.77	32.03	28.24	39.56	29	35.78	40	31.97	32.19	33.92	31.83	40	30.48	33.6	33.99	34.36	35.44	31.65	32.79	34.71	32.3	32.89	37.52
	Healthy control (human)
miR-129-5p	38.53	38.86	38.26	32.51	33.5	37.88	35.85	34.43	35.38	35.54	38.37	36.89	40	33.3	39.34	38.49	39.37	35.81	34.88	34.84	33.23	35.25	32.06	35.07	35.62	36.15	34.49	34.11	34.38	29.98	33.63	34.8	31.14	32.62	31.82	33.49	36.74	35.23
miR-152-5p	39.42	39.69	40	37.31	40	38.53	37.65	39.53	38.53	40	40	40	40	34	39.89	40	40	37.37	39.66	38.86	40	40	37.36	37.64	40	40	38.31	40	40	36.14	38.28	39.49	36.82	37.95	38.18	40	40	40
miR-21a-5p	25.68	20.56	31.66	24.74	27.08	25.94	17.12	23.66	24.42	23.98	30.38	30.76	26.97	24.49	27.96	24.08	27.21	24.79	30.18	28.84	29.96	28.25	33.22	31.85	27.35	31.82	27.35	29.47	27.85	31.2	20.46	28.91	28.44	24.5	31.06	27.52	31.05	29.07
miR-212-5p	40	40	40	33.67	40	37.99	38.21	40	40	40	40	40	40	34.22	40	40	40	39.97	40	39.73	40	38.04	39.69	40	40	40	40	39.28	40	35.7	36.36	40	38.23	38.46	37.2	40	40	40
miR-374b-5p	40	40	37.76	32.2	37.49	37.93	34.97	39.42	38.91	40	40	40	40	32.73	40	40	40	38.29	40	40	37.95	40	35.92	40	39.69	40	37.64	36.97	40	34.04	37.66	38.9	36.31	36.85	34.55	37.56	40	39.15
miR-664-3p	39.02	32.03	40	34.01	34.32	37.35	26.55	33.12	34.87	34.46	40	37.73	37.46	32.22	36.37	33.55	36.27	33.15	38.22	37.51	37.18	37.19	35.08	40	38.82	40	35.73	36.2	36.31	31.97	30.19	36.2	33.61	34.16	34.14	35.61	40	37.44
miR-9-5p	40	38.33	40	32.55	40	38.16	32.31	39.71	39.15	38.52	40	40	40	34.17	40	40	40	38.5	26.52	27.53	27.25	27.29	30.02	29.29	27.26	26.62	26.21	26.73	26.21	28.94	26.51	26.61	26.52	25.99	27.02	26.39	27.24	27.43
RNU6	40	39.07	40	33.02	35.85	33.6	32.66	33.09	34.5	34.53	40	39.97	37.32	32.57	39.4	36.97	37.68	34.9	40	40	40	38.55	40	40	37.31	40	38.32	40	38.25	40	29.24	37.23	36.52	34.81	40	38.22	40	40
